# Supplementary material for: Enhancing the electrocatalytic OER activity of Co-MOFs through labile solvents coordination
Source: Royal Society of Chemistry journal article supplement (doi:10.1039/d3nj03660j), 2023-01-01
Supplement: d3nj03660j1.pdf [file d3nj03660j1.pdf]

## Enhancing the electrocatalytic OER activity of Co-MOFs through labile solvents coordination

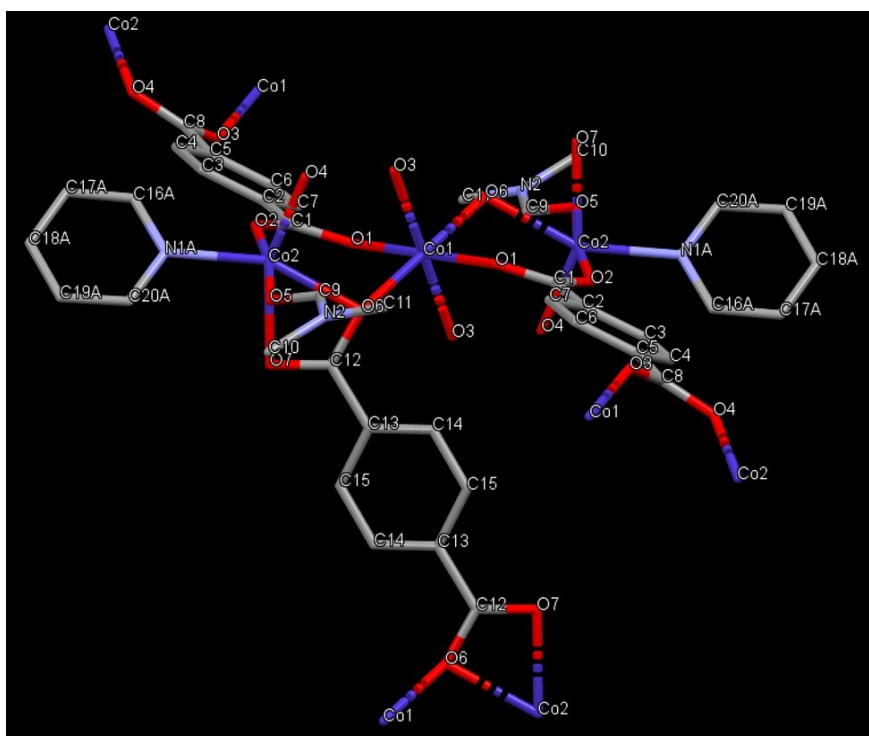

Figure S1. Molecular structure in the crystal lattice of **Co-MOF-1**. C (grey), H (white), N (blue), O (red) and Co (dark blue). Hydrogen atoms are removed for clarity.

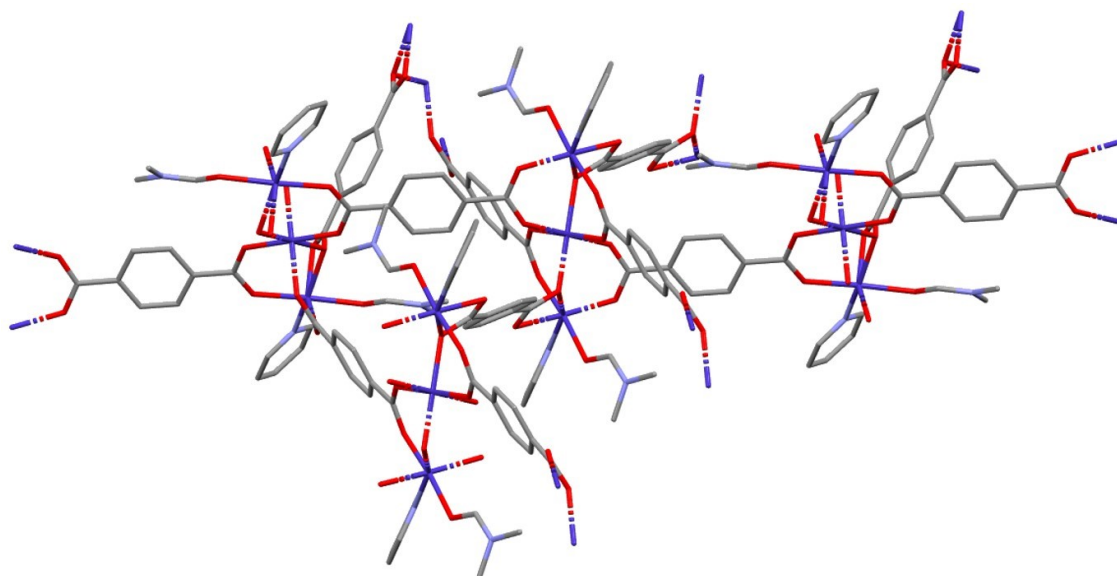

Figure S2. The coordination of BDC, pyridine and DMF with different cobalt centre of **Co-MOF-1**. C (grey), H (white), N (blue), O (red) and Co (dark blue). Hydrogen atoms are removed for clarity.

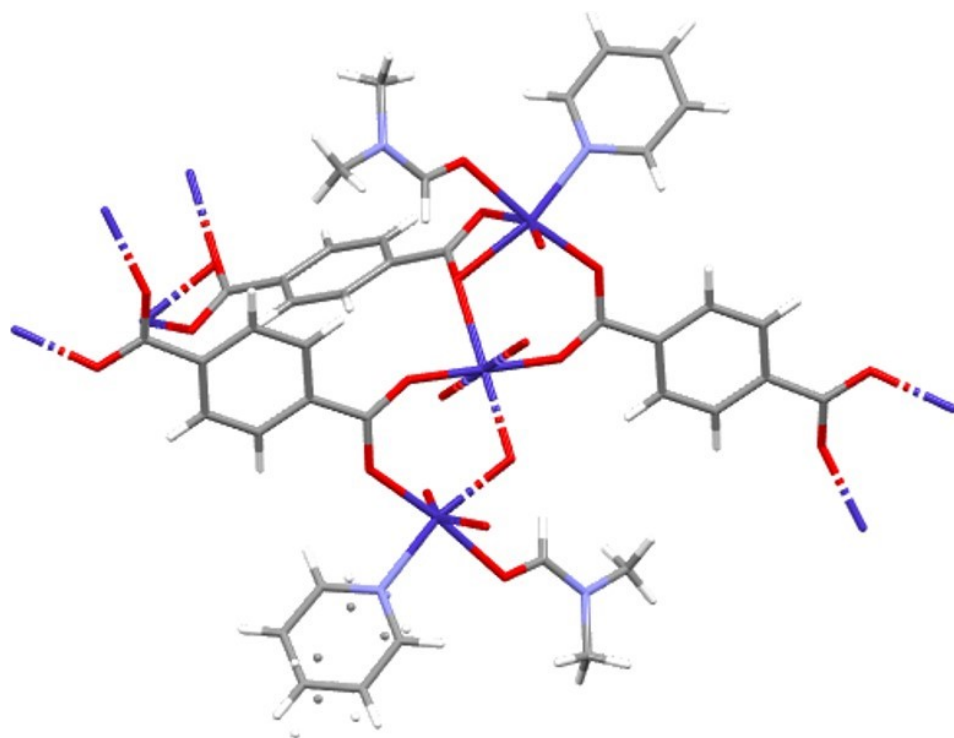

Figure S3. Molecular structure of **Co-MOF-1** in the crystal lattice. C (grey), H (white), N (blue), O (red) and Co (dark blue).

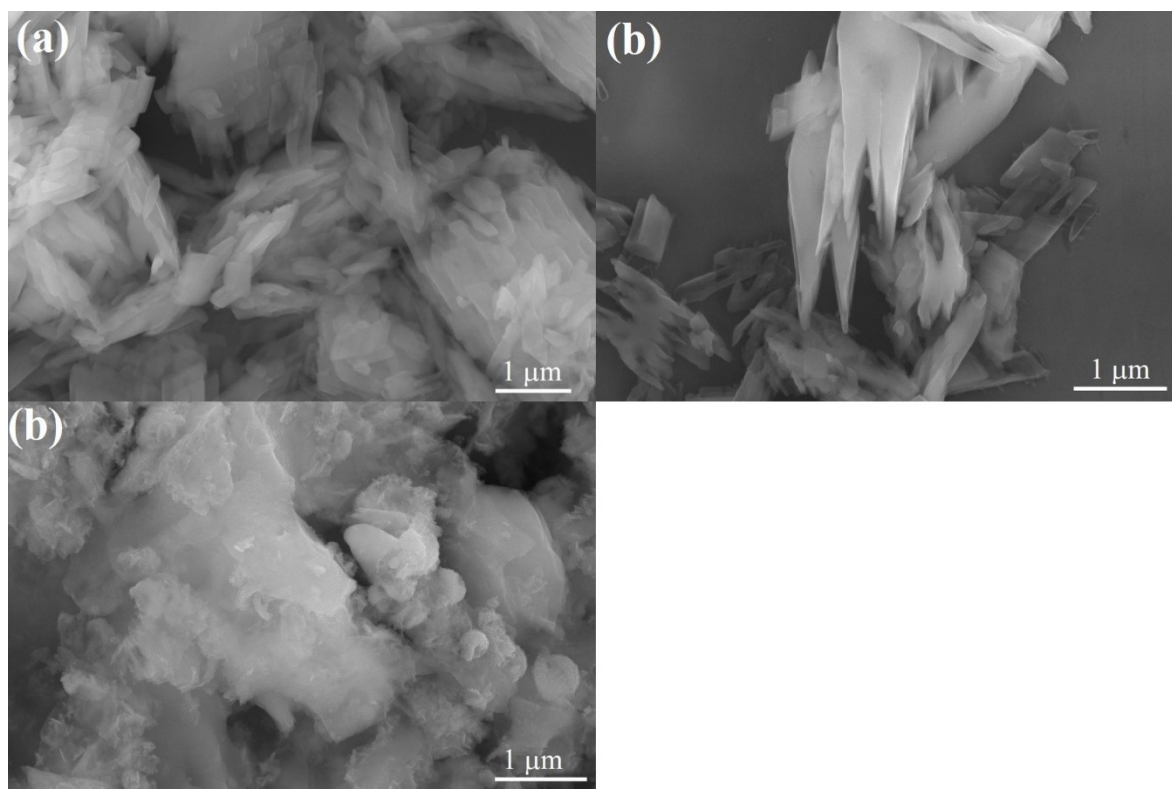

Figure S4. FE-SEM images of (a) **Co-MOF-1**, (b) **Co-MOF-2** and (c) **Co-MOF-1** (after catalysis)

Table S1. Crystal data and structure refinement for **Co-MOF-1** (CCDC No 2246026).

|                                   |                                                                                |                 |
|-----------------------------------|--------------------------------------------------------------------------------|-----------------|
| Identification code               | <b>Co-MOF-1</b>                                                                |                 |
| Empirical formula                 | C <sub>40</sub> H <sub>36</sub> Co <sub>3</sub> N <sub>4</sub> O <sub>14</sub> |                 |
| Formula weight                    | 973.52                                                                         |                 |
| Temperature                       | 220(2) K                                                                       |                 |
| Wavelength                        | 0.610 Å                                                                        |                 |
| Crystal system                    | Monoclinic                                                                     |                 |
| Space group                       | <i>P</i> 2 <sub>1</sub> / <i>n</i>                                             |                 |
| Unit cell dimensions              | a = 14.496(3) Å                                                                | α = 90°.        |
|                                   | b = 9.7410(19) Å                                                               | β = 109.61(3)°. |
|                                   | c = 16.453(3) Å                                                                | γ = 90°.        |
| Volume                            | 2188.4(8) Å <sup>3</sup>                                                       |                 |
| Z                                 | 2                                                                              |                 |
| Density (calculated)              | 1.477 Mg/m <sup>3</sup>                                                        |                 |
| Absorption coefficient            | 0.782 mm <sup>-1</sup>                                                         |                 |
| F(000)                            | 994                                                                            |                 |
| Crystal size                      | 0.105 x 0.065 x 0.020 mm <sup>3</sup>                                          |                 |
| Theta range for data collection   | 1.393 to 24.999°.                                                              |                 |
| Index ranges                      | -20 ≤ h ≤ 20, -13 ≤ k ≤ 13, -22 ≤ l ≤ 22                                       |                 |
| Reflections collected             | 21779                                                                          |                 |
| Independent reflections           | 6077 [R(int) = 0.0908]                                                         |                 |
| Completeness to theta = 21.469°   | 99.3 %                                                                         |                 |
| Absorption correction             | Empirical                                                                      |                 |
| Max. and min. transmission        | 1.000 and 0.862                                                                |                 |
| Refinement method                 | Full-matrix least-squares on F <sup>2</sup>                                    |                 |
| Data / restraints / parameters    | 6077 / 178 / 334                                                               |                 |
| Goodness-of-fit on F <sup>2</sup> | 1.001                                                                          |                 |
| Final R indices [I > 2σ(I)]       | R1 = 0.0662, wR2 = 0.1859                                                      |                 |
| R indices (all data)              | R1 = 0.0779, wR2 = 0.1934                                                      |                 |
| Extinction coefficient            | n/a                                                                            |                 |
| Largest diff. peak and hole       | 2.616 and -0.716 e.Å <sup>-3</sup>                                             |                 |

Table S2. Crystal data and structure refinement for **Co-MOF-2**.

|                                   |                                                                                |                |
|-----------------------------------|--------------------------------------------------------------------------------|----------------|
| Identification code               | <b>Co-MOF-2</b>                                                                |                |
| Empirical formula                 | C <sub>38</sub> H <sub>36</sub> Co <sub>3</sub> N <sub>2</sub> O <sub>16</sub> |                |
| Formula weight                    | 953.48                                                                         |                |
| Temperature                       | 220(2) K                                                                       |                |
| Wavelength                        | 0.630 Å                                                                        |                |
| Crystal system                    | Monoclinic                                                                     |                |
| Space group                       | C2/c                                                                           |                |
| Unit cell dimensions              | a = 33.257(7) Å                                                                | α = 90°.       |
|                                   | b = 9.810(2) Å                                                                 | β = 97.78(3)°. |
|                                   | c = 17.964(4) Å                                                                | γ = 90°.       |
| Volume                            | 5807(2) Å <sup>3</sup>                                                         |                |
| Z                                 | 4                                                                              |                |
| Density (calculated)              | 1.091 Mg/m <sup>3</sup>                                                        |                |
| Absorption coefficient            | 0.643 mm <sup>-1</sup>                                                         |                |
| F(000)                            | 1948                                                                           |                |
| Crystal size                      | 0.125 x 0.058 x 0.015 mm <sup>3</sup>                                          |                |
| Theta range for data collection   | 1.096 to 26.495°.                                                              |                |
| Index ranges                      | -46 ≤ h ≤ 46, -12 ≤ k ≤ 12, -25 ≤ l ≤ 25                                       |                |
| Reflections collected             | 24935                                                                          |                |
| Independent reflections           | 7446 [R(int) = 0.1283]                                                         |                |
| Completeness to theta = 22.210°   | 98.9 %                                                                         |                |
| Absorption correction             | Empirical                                                                      |                |
| Max. and min. transmission        | 1.000 and 0.799                                                                |                |
| Refinement method                 | Full-matrix least-squares on F <sup>2</sup>                                    |                |
| Data / restraints / parameters    | 7446 / 0 / 271                                                                 |                |
| Goodness-of-fit on F <sup>2</sup> | 0.828                                                                          |                |
| Final R indices [I > 2σ(I)]       | R1 = 0.0816, wR2 = 0.2140                                                      |                |
| R indices (all data)              | R1 = 0.1967, wR2 = 0.2381                                                      |                |
| Extinction coefficient            | n/a                                                                            |                |
| Largest diff. peak and hole       | 1.166 and -0.861 e.Å <sup>-3</sup>                                             |                |

| S. No | Catalyst                                | Org. linker                                                 | Substrate    | Over potential $\eta$ at 10mA | Tafel mV/dec      | Reference        |
|-------|-----------------------------------------|-------------------------------------------------------------|--------------|-------------------------------|-------------------|------------------|
| 1     | Ultrathin 2D Co-MOF                     | Terephthalate                                               | GCE          | 371                           | 74                | 1                |
| 2     | CoBDC                                   | Terephthalate                                               | GCE          | 334                           | -                 | 2                |
| 3     | CoMONs                                  | Terephthalate                                               | Carbon paper | 309                           | 75.71             | 3                |
| 4     | CoBDC-Fc-NF                             | Terephthalate and Ferrocene carboxylic acid                 | Nickel Foam  | 178                           | 51                | 4                |
| 5     | Ti <sub>3</sub> C <sub>2</sub> Tx-CoBDC | Citrate                                                     | GCE          | 410                           | 48.2              | 5                |
| 6     | Co-BPDC/Co BDC-3                        | 1,4-benzenedicarboxylic acid and 4,4'-biphenyldicarboxylate | GCE          | 335                           | 72.1              | 6                |
| 7     | UTSA-16                                 | Citrate                                                     | GCE          | 408                           | 77                | 7                |
| 8     | Co-MOF NF                               | Terephthalic acid                                           | Nickel foam  | 311 @50mA                     | 77                | 8                |
| 9     | MAF-X27-OH                              | 1H,5H-benzo(1,2-d:4,5-d')bistriazole                        | GCE          | 387                           | 60                | 9                |
| 10    | Co-OBA/C                                | 4,4'-oxybis(benzonic acid), and imidazole                   | GCE          | 774 (vs Ag/AgCl)              | 85.7 (vs Ag/AgCl) | 10               |
| 11    | Co-MOF@CNTs (5 wt%)                     | benzimidazole                                               | GCE          | 340                           | 69                | 11               |
| 12    | CoTPA-D                                 | Terephthalate                                               | Carbon cloth | 273                           | 67                | 12               |
| 13    | Co-MOF-1                                | Terephthalate                                               | GCE          | 294                           | 57.5              | <b>This work</b> |

Table S3. Comparison of Co-MOFs electrocatalytic OER activity.

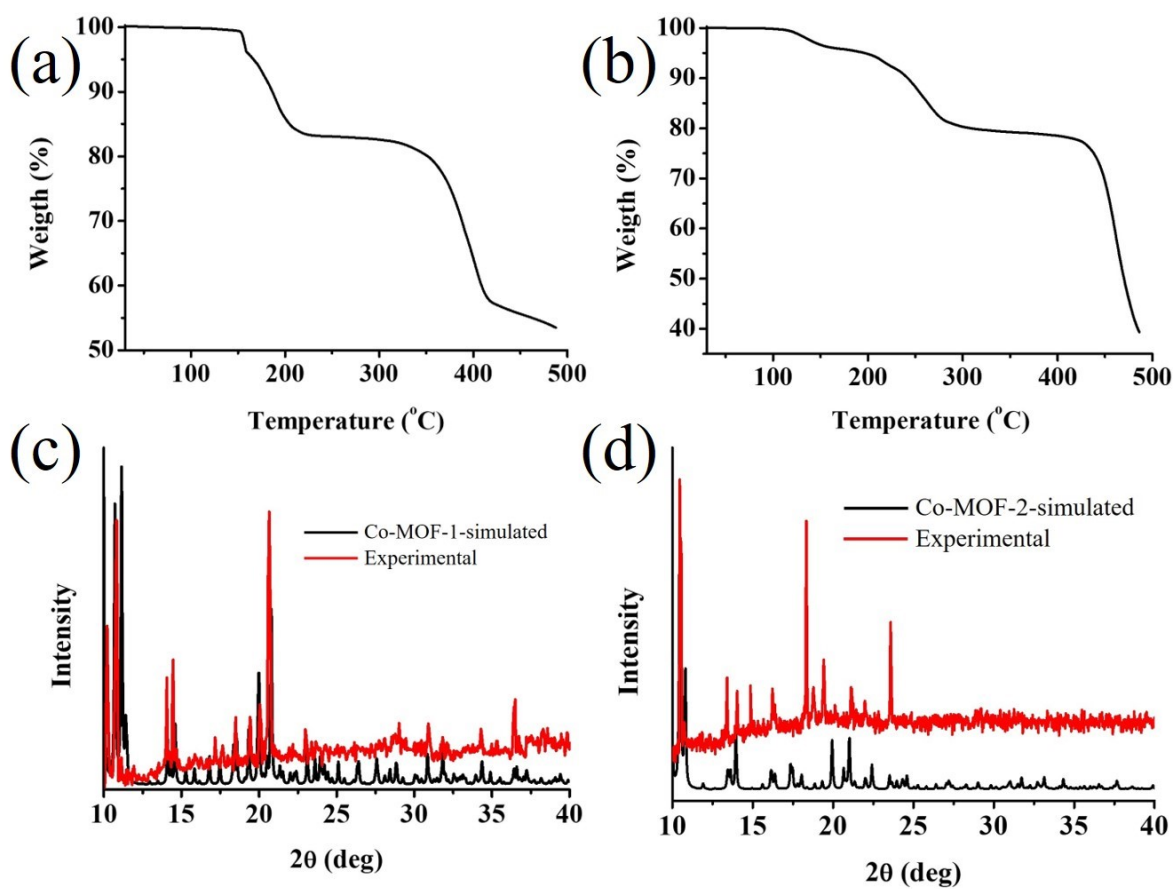

Figure S5. (a, b) PXRD and (c, d) TGA of (a, c) Co-MOF-1 and (b, d) Co-MOF-2.

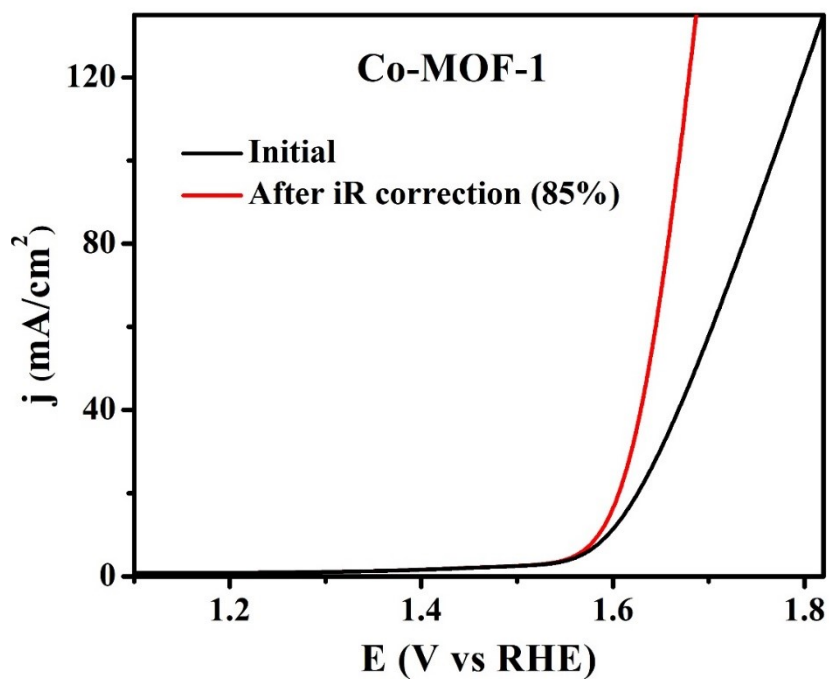

Figure S6. OER polarization curves of Co-MOF-1 before and after iR correction.

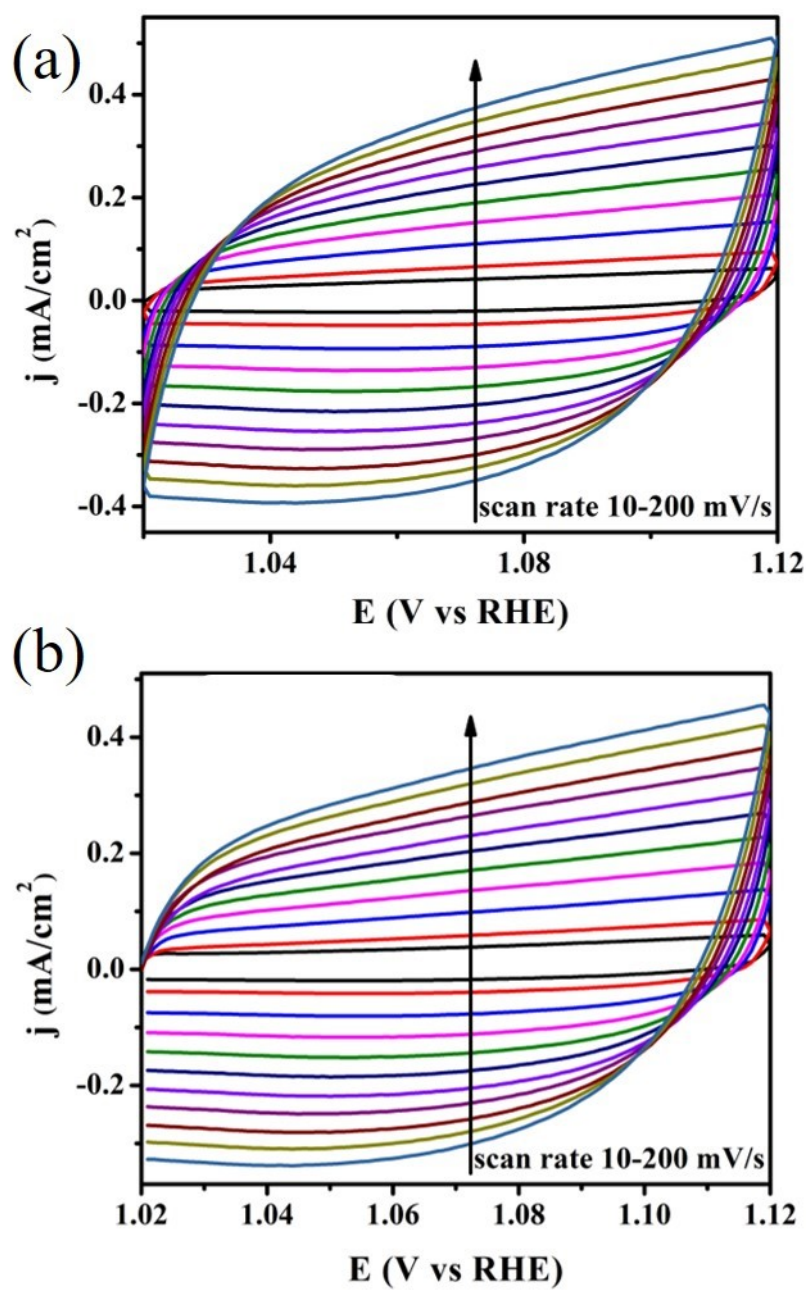

Figure S7. Double layer capacitance and capacitive currents as a functional of scan rate.

## References

- 1 S. Zhao, Y. Wang, J. Dong, C.-T. He, H. Yin, P. An, K. Zhao, X. Zhang, C. Gao, L. Zhang, J. Lv, J. Wang, J. Zhang, A. M. Khattak, N. A. Khan, Z. Wei, J. Zhang, S. Liu, H. Zhao and Z. Tang, *Nat Energy*, 2016, **1**, 16184.
- 2 X. Cai, F. Peng, X. Luo, X. Ye, J. Zhou, X. Lang and M. Shi, *ChemSusChem*, 2021, **14**, 3163–3173.
- 3 X. Wang, H. Zhang, Z. Yang, C. Zhang and S. Liu, *Ultrasonics Sonochemistry*, 2019, **59**, 104714.
- 4 Z. Xue, K. Liu, Q. Liu, Y. Li, M. Li, C. Y. Su, N. Ogiwara, H. Kobayashi, H. Kitagawa, M. Liu and G. Li, *Nature communications*, 2019, **10**, 5048
- 5 L. Zhao, B. Dong, S. Li, L. Zhou, L. Lai, Z. Wang, S. Zhao, M. Han, K. Gao, M. Lu, X. Xie, B. Chen, Z. Liu, X. Wang, H. Zhang, H. Li, J. Liu, H. Zhang, X. Huang and W. Huang, *ACS Nano*, 2017, **11**, 5800–5807.
- 6 Q. Zha, F. Yuan, G. Qin and Y. Ni, *Inorg Chem*, 2020, **59**, 1295–1305.
- 7 J. Jiang, L. Huang, X. Liu and L. Ai, *ACS Appl Mater Interfaces*, 2017, **9**, 7193–7201.
- 8 X. Zhang, W. Sun, H. Du, R. M. Kong and F. Qu, *Inorg Chem Front*, 2018, **5**, 344–347.
- 9 X. F. Lu, P. Q. Liao, J. W. Wang, J. X. Wu, X. W. Chen, C. T. He, J. P. Zhang, G. R. Li and X. M. Chen, *J Am Chem Soc*, 2016, **138**, 8336–8339.
- 10 T. Fan, F. Yin, H. Wang, X. He and G. Li, *Int J Hydrogen Energy*, 2017, **42**, 17376–17385.
- 11 Y. Fang, X. Li, F. Li, X. Lin, M. Tian, X. Long, X. An, Y. Fu, J. Jin and J. Ma, *J Power Sources*, 2016, **326**, 50–59.
- 12 G. Arunkumar, P. Nantheeswaran, M. Mariappan, R. K. Kamlekar, M. Pannipara, A. G. Al-Sehemi and S. P. Anthony, *New Journal of Chemistry*, 2023, **47**, 9654–9660.
